# Supplementary material for: Computations of uncertainty mediate acute stress responses in humans
Source: PubMed Central journal article supplement (PMC4820542; doi:10.1038/ncomms10996), 2016-03-29
Supplement: ncomms10996-s1.pdf [file ncomms10996-s1.pdf]

1 **SUPPLEMENTARY FIGURES**

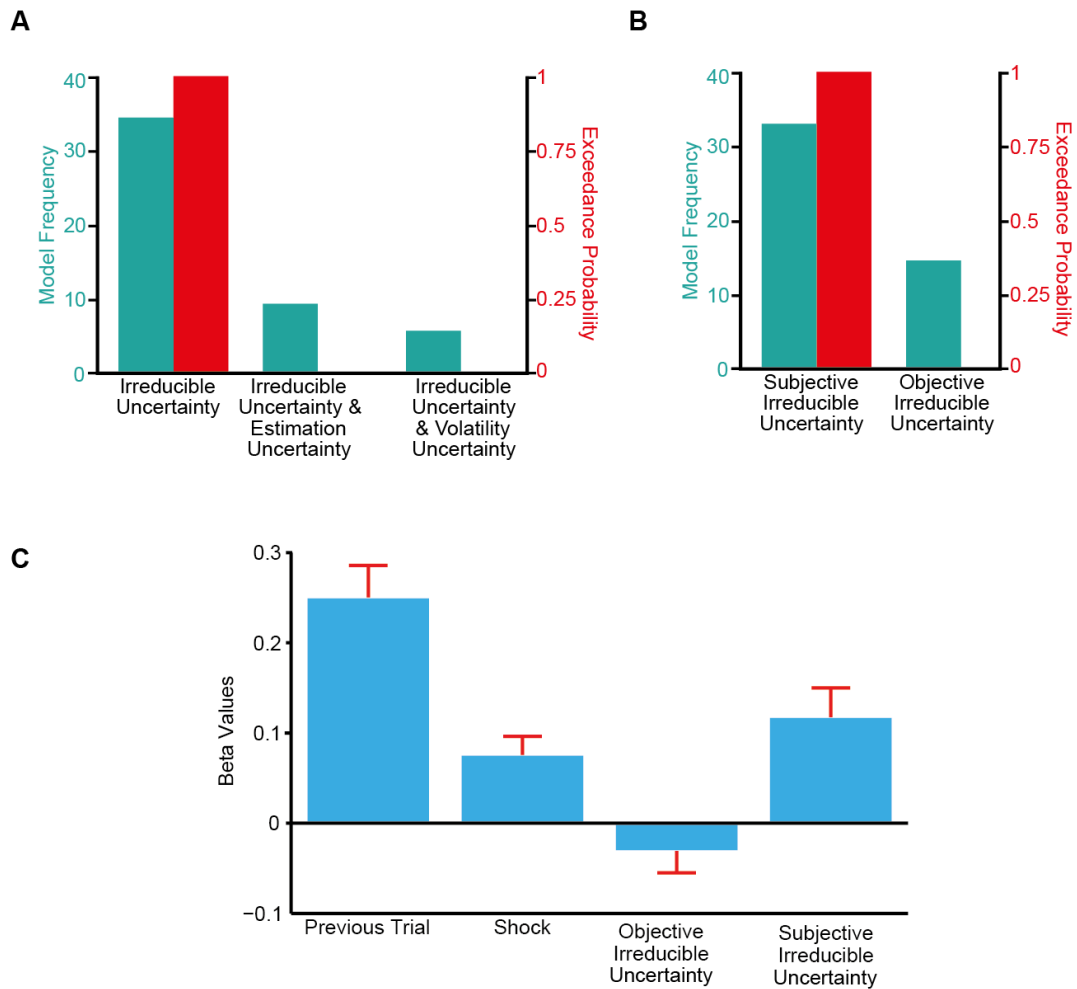

2

3 **Supplementary Figure 1**

4 **Assessing alternative models of subjective stress** (A) Model comparison demonstrated that  
 5 adding additional estimation or volatility uncertainty did not improve the performance of the  
 6 irreducible uncertainty model used to explain subjective stress responses (Model  
 7 Frequency=70.5%, Exceedance Probability~1). (B) Model comparison confirmed that  
 8 subjective uncertainty as furnished by the HGF model provided a better predictor of subjective  
 9 stress (Model Frequency=70.5%, Exceedance Probability=0.993) than objective uncertainty.  
 10 (C) As expected, objective and subjective uncertainty are correlated (Pearson correlation,  
 11 mean  $r=0.452$ ); if both are placed in the model, only subjective uncertainty provides a significant  
 12 predictor of subjective stress. Error bars are SEM across participants.

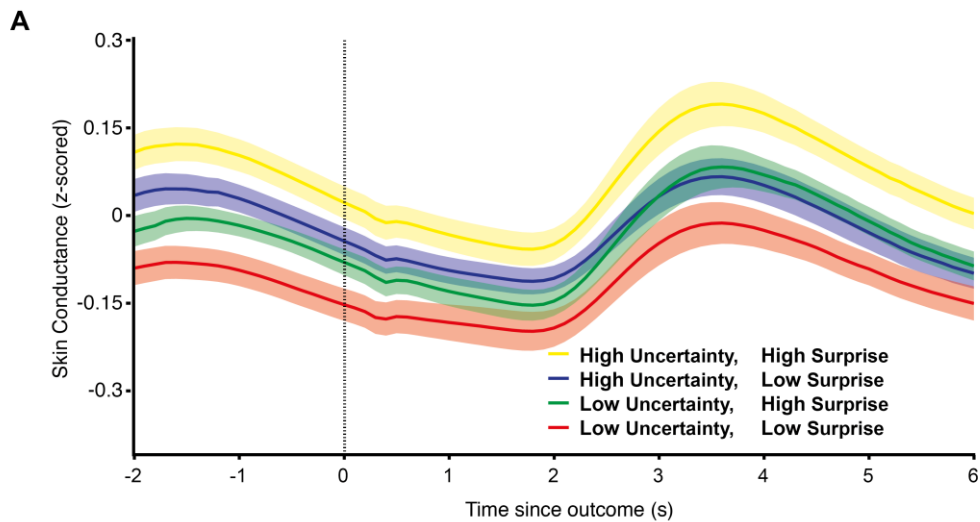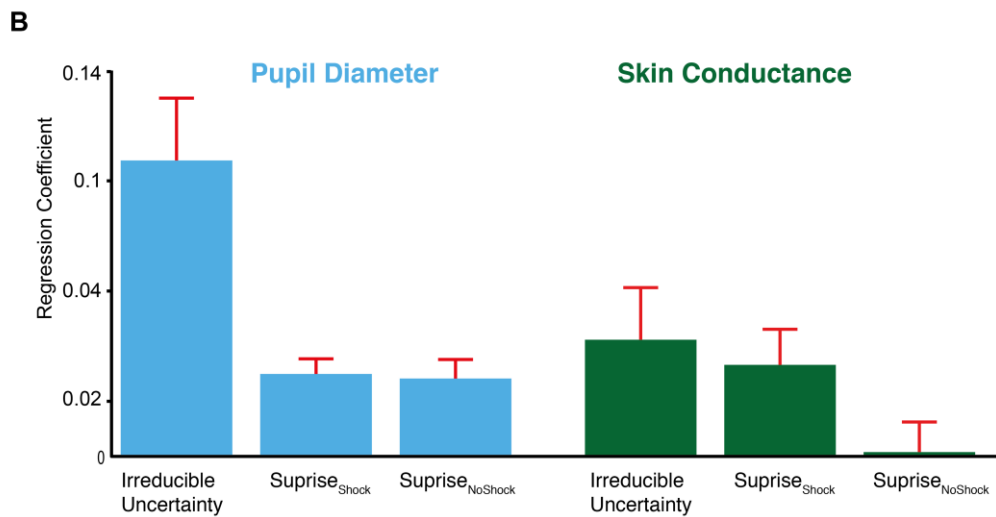

13

14 **Supplementary Figure 2**

15 **Additional physiological stress data (A)** We split trials by uncertainty and surprise (see main  
 16 results and Fig. 4A). Average skin conductance was higher for trials with higher uncertainty and  
 17 surprise (Repeated Measures ANOVA, Uncertainty:  $F_{1,36}=9.36$ ,  $p=0.004$ ,  $\eta^2=0.104$ , Surprise:  
 18  $F_{1,36}=12.40$ ,  $p=0.001$ ,  $\eta^2=0.070$ ), with no evidence of an interaction ( $F_{1,36}=0.14$ ,  $p=0.71$ ). (B)  
 19 Our regression models of pupil diameter and skin conductance included regressors for surprise  
 20 at outcome, to ensure that correlations with surprise were not attributed to uncertainty.  
 21 Uncertainty was a significant predictor of both pupil diameter (robust regression,  $\beta=0.11$ ,  
 22 single-sample t-test  $t_{21}=4.72$ ,  $p<0.001$ ) and skin conductance (robust regression,  $\beta=0.044$ ,  
 23 single-sample t-test  $t_{36}=2.25$ ,  $p=0.031$ ), with surprise predicting pupil diameter equally on shock

24 and no shock trials (robust regression, Surprise<sub>Shock</sub>:  $\beta=0.018$ , single-sample t-test  $t_{21}=4.11$ ,  
25  $p<0.001$ ; Surprise<sub>NoShock</sub>:  $\beta=0.017$ ,  $t_{21}=3.05$ ,  $p=0.0060$ ; Difference, paired t-test  $t_{21}=0.209$ ,  
26  $p=0.84$ ). However, skin conductance reflected surprise asymmetrically, with the parameter for  
27 surprise on shock trials greater than that for no-shock trials (robust regression, Surprise<sub>Shock</sub>:  
28  $\beta=0.035$ , single-sample t-test  $t_{36}=2.58$ ,  $p=0.014$ ; Surprise<sub>NoShock</sub>:  $\beta=0.0019$ , single-sample t-  
29 test  $t_{36}=0.167$ ,  $p=0.87$ ; Difference, paired t-test  $t_{36}=1.84$ ,  $p=0.07$ ). This replicates previous  
30 observations of asymmetric prediction error representations in skin conductance  
31 measurements <sup>1</sup>. However, a direct comparison of parameters from participants for whom we  
32 recorded both pupil diameter and skin suggested that the two were not significantly different,  
33 with neither a main effect (Repeated Measures ANOVA, Effect of recording modality,  
34  $F_{1,35}=2.82$ ,  $p=0.11$ ,  $\eta^2=0.025$ ) nor an interaction between modality and regressor (Repeated  
35 Measures ANOVA, Modality x Regressor interaction,  $F_{1,35}=0.96$ ,  $p=0.39$ ,  $\eta^2=0.012$ ). We are  
36 therefore unable to reject the null hypothesis that pupil diameter and skin conductance track  
37 aversive learning in comparable manners; disparities between the two may therefore be a result  
38 of low signal-to-noise in skin conductance measurements. Error bars are SEM across  
39 participants.

40

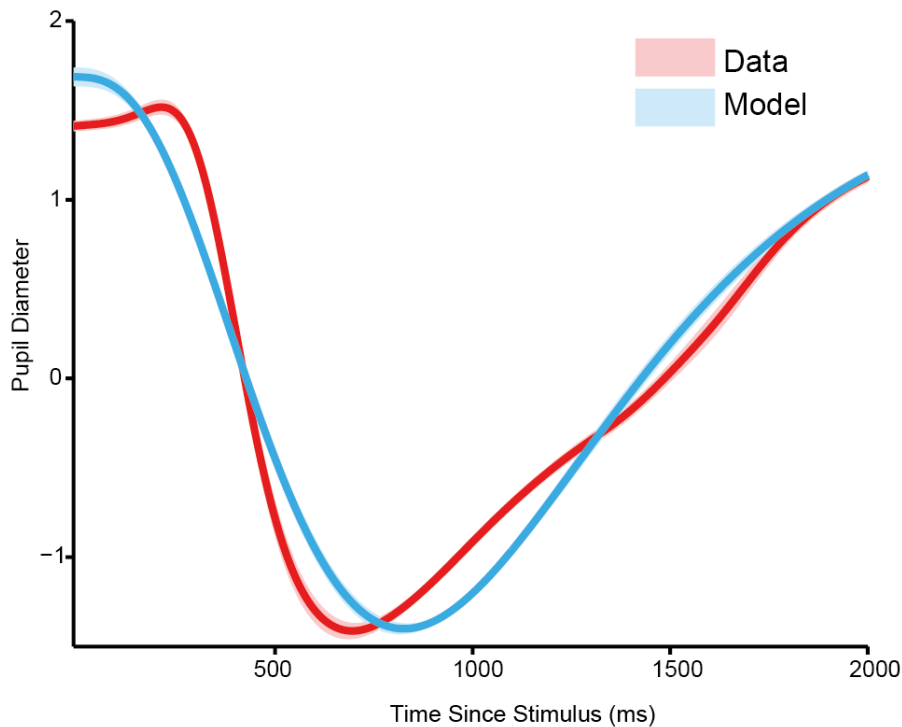

42

43 **Supplementary Figure 3**

44 **Luminance fitting procedure used for model of pupil diameter.** In order to accommodate  
 45 fluctuations in pupil diameter induced by luminance changes, we fit a luminance response  
 46 function for each subject. This was conducted using a reference data set acquired after the  
 47 experiment, in which each of the images used in the experiment was shown 50 times. We then  
 48 fit a single luminance response function using data from all image presentations (red trace  
 49 above, shading is SEM). We used the gamma response function defined in <sup>2</sup> which has two  
 50 free parameters: time to peak ( $T_{max}$ ) and number of cascade components ( $n$ ). We found the  
 51 best fitting pair of parameters for our luminance response function using gradient descent  
 52 methods implemented by the MatLab function `fmincon` (blue trace above, shading is SEM). As  
 53 expected from the fast constriction typically associated with the light reflex, the average  $T_{max}$  in  
 54 our luminance response function was smaller than that used in the conventional response  
 55 function (839ms vs 930ms). We were thus able to include luminance responses in our  
 56 regression models of pupil diameter (Figure 5 and S2B).

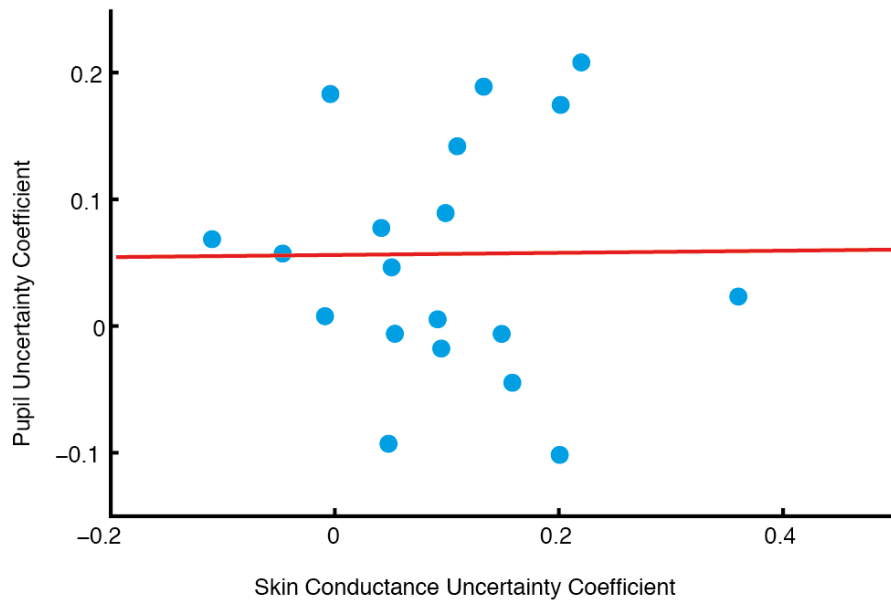

57

58 **Supplementary Figure 4**

59 **Pupillary and skin conductance sensitivity to uncertainty are uncorrelated.** We found no  
60 evidence of correlation between pupillary and skin conductance sensitivity to uncertainty  
61 (Pearson correlation,  $n=19$ ,  $r=0$ ,  $p=0.97$ ). This is in contrast to the positive correlation observed  
62 between each of these parameters and subjective stress uncertainty sensitivity (Figure 5D).

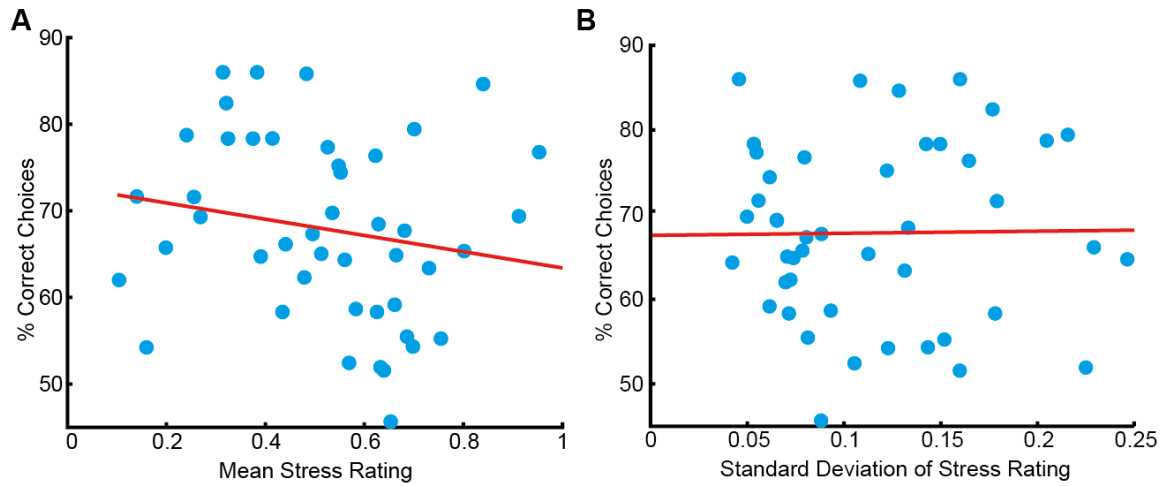

63

64 **Supplementary Figure 5**

65 **Mean and variance of subjective stress ratings are unrelated to performance.** Neither  
 66 mean (A) (Pearson correlation,  $n=45$ ,  $r=-0.18$ ,  $p=0.23$ ) nor standard deviation (B) (Pearson  
 67 correlation  $n=45$ ,  $r=0.014$ ,  $p=0.93$ ) of subjective stress ratings relate to performance on our  
 68 task. Conversely, computational modelling reveals that the ‘uncertainty-tuning’ of stress  
 69 responses based on dynamic uncertainty estimates is correlated with task performance (6e 5).

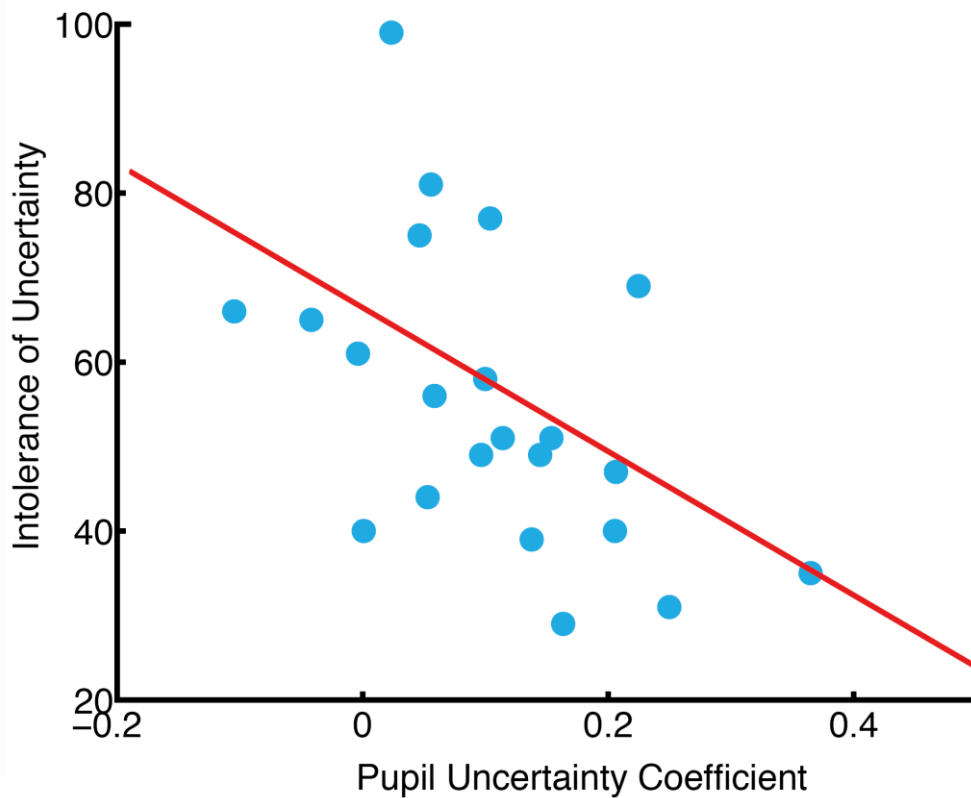

70

71 **Supplementary Figure 6**

72 **Uncertainty-tuning in the pupil is inversely correlated with Intolerance of Uncertainty.**

73 Pupillary sensitivity to uncertainty was inversely related to a questionnaire measure of  
 74 uncertainty aversion (Intolerance of Uncertainty; Buhr et al., 2002). Subjects with greater pupil  
 75 sensitivity to uncertainty were less averse to uncertainty (Pearson correlation,  $n=22$ ,  $r=-0.51$ ,  
 76  $p=0.015$ ). This may be related to the other effect we observed, that performance under  
 77 uncertainty is predicted by the sensitivity of the pupil to uncertainty (Figure 6B); aversion to  
 78 uncertainty may be a preference rooted in the fact that individuals whose pupils do not track  
 79 uncertainty perform poorly when in uncertain situations.

## 80 SUPPLEMENTARY TABLES

81 Supplementary Table 1: Parameters used in pupil model

| Parameter                 | Mean    | SEM    | $t_{21}$ | $p$    | Form                                                                                    |
|---------------------------|---------|--------|----------|--------|-----------------------------------------------------------------------------------------|
| Constant                  | 0.0614  | 0.0229 | 2.68     | 0.0140 |                                                                                         |
| Stimuli*                  | -0.0704 | 0.0165 | -4.27    | <0.001 | Delta function,<br>aligned to stimuli<br>presentations,<br>luminance<br>convolved       |
| Outcome                   | -0.6922 | 0.1774 | -3.90    | <0.001 | Delta function,<br>aligned to all<br>outcomes,<br>luminance<br>convolved                |
| Shocks                    | 0.4930  | 0.1042 | 4.73     | <0.001 | Delta function<br>aligned to shock<br>outcomes                                          |
| No Shocks                 | 0.2561  | 0.1106 | 2.32     | 0.0308 | Delta function<br>aligned to no<br>shock outcomes                                       |
| Surprise <sub>Shock</sub> | 0.0183  | 0.0045 | 4.11     | <0.001 | Delta function<br>aligned to shocks<br>and scaled by trial<br>surprise ( $ \delta_1 $ ) |



|                         |         |        |       |        |                                                                                    |
|-------------------------|---------|--------|-------|--------|------------------------------------------------------------------------------------|
| Surprise No Shock       | 0.0167  | 0.0055 | 3.05  | 0.0060 | Delta function aligned to no shocks and scaled by trial surprise ( $ \delta_1 $ )  |
| Irreducible Uncertainty | 0.1069  | 0.0227 | 4.72  | <0.001 | Boxcar from stimulus onset, scaled by trial irreducible uncertainty ( $\sigma_1$ ) |
| Gaze X coordinate       | -0.0501 | 0.0102 | -4.90 | <0.001 | Unconvolved                                                                        |
| Gaze Y coordinate       | 0.0051  | 0.0218 | 0.23  | 0.818  | Unconvolved                                                                        |

Predictors were convolved with a standard pupillary response function (see SI Methods). The exceptions were the gaze X and Y coordinates, which were unconvolved, and the Stimuli regressor. For all phasic responses (Stimuli, Outcome, Shock, No Shock, Surprise Shock, Surprise No Shock), we also convolved predictors with first and second derivatives of the response function to allow for variance in the shape and timing of the response (data not shown).

\* The Stimuli regressor was not convolved with the canonical pupillary response function, but with the luminance response function estimated for each subject. See Supplementary Figure 3 for details.

83 **Supplementary Table 2: Parameters used in skin conductance models**

| Parameter      | Mean    | SEM    | $t_{21}$ | $p$    | Form                                                                           |
|----------------|---------|--------|----------|--------|--------------------------------------------------------------------------------|
| Constant       | -0.1054 | 0.0111 | -9.47    | <0.001 |                                                                                |
| Stimuli        | -0.0093 | 0.0087 | -1.07    | 0.2905 | Delta function, aligned to stimuli presentations, luminance convolved          |
| Outcome        | 0.1177  | 0.0260 | 4.53     | <0.001 | Delta function, aligned to all outcomes, luminance convolved                   |
| Shocks         | 0.0698  | 0.0242 | 2.89     | 0.0066 | Delta function aligned to shock outcomes                                       |
| No Shocks      | -0.1890 | 0.0347 | -5.45    | <0.001 | Delta function aligned to no shock outcomes                                    |
| Surprise Shock | 0.0347  | 0.0134 | 2.59     | 0.0139 | Delta function aligned to shocks and scaled by trial surprise ( $ \delta 1 $ ) |

|                                                                                                                                                                                                                                                                                                                                                                                                                                                                                                                                                     |        |        |      |        |                                                                                    |
|-----------------------------------------------------------------------------------------------------------------------------------------------------------------------------------------------------------------------------------------------------------------------------------------------------------------------------------------------------------------------------------------------------------------------------------------------------------------------------------------------------------------------------------------------------|--------|--------|------|--------|------------------------------------------------------------------------------------|
| Surprise No Shock                                                                                                                                                                                                                                                                                                                                                                                                                                                                                                                                   | 0.0019 | 0.0113 | 0.17 | 0.8686 | Delta function aligned to no shocks and scaled by trial surprise ( $ \delta 1 $ )  |
| Irreducible Uncertainty                                                                                                                                                                                                                                                                                                                                                                                                                                                                                                                             | 0.0442 | 0.0196 | 2.25 | 0.0305 | Boxcar from stimulus onset, scaled by trial irreducible uncertainty ( $\sigma 1$ ) |
| <p>Predictors were convolved with a standard skin conductance response function (see SI Methods).</p> <p>We also included regressors for each block (i.e. each stretch of 10 minutes between breaks) to account for changes in baseline between blocks.</p> <p>As with the pupil model, for all phasic responses (Stimuli, Outcome, Shock, No Shock, Surprise Shock, Surprise No Shock), we also convolved predictors with first and second derivatives of the response function to allow for variance in the shape and timing of the response.</p> |        |        |      |        |                                                                                    |

84

85 **Supplementary Table 3**

| Parameter                                                                                                                                                                                                               | Notes                                                                                                                         | Value                                            |
|-------------------------------------------------------------------------------------------------------------------------------------------------------------------------------------------------------------------------|-------------------------------------------------------------------------------------------------------------------------------|--------------------------------------------------|
| <i>Model constants</i>                                                                                                                                                                                                  |                                                                                                                               |                                                  |
| $\vartheta$                                                                                                                                                                                                             | Metavolatility parameter, controlling step size at the third level. Estimated in logit space.                                 | <b>Mean</b> = 0                                  |
|                                                                                                                                                                                                                         |                                                                                                                               | <b>Variance</b> = 16                             |
| $\omega$                                                                                                                                                                                                                | Constant component of the learning rate at the second level. Estimated in native space.                                       | <b>Mean</b> = -2                                 |
|                                                                                                                                                                                                                         |                                                                                                                               | <b>Variance</b> = 16                             |
| $\kappa$                                                                                                                                                                                                                | Modulates coupling between 3 <sup>rd</sup> and 2 <sup>nd</sup> levels. Held constant.                                         |                                                  |
| <i>Trajectories</i>                                                                                                                                                                                                     |                                                                                                                               |                                                  |
| <p>Note that since uncertainty (<math>\sigma</math>) has a natural lower bound at zero – one cannot have negative uncertainty – it is estimated in log space. The numbers given here refer to values in that space.</p> |                                                                                                                               |                                                  |
| <b>Predictions (<math>X_1</math>)</b>                                                                                                                                                                                   | The predictions are a sigmoid transformation of the probabilities represented in $X_2$ , and so do not have a starting value. | $\hat{\mu}_1$ :                                  |
|                                                                                                                                                                                                                         |                                                                                                                               | <b>Mean</b> = none<br><br><b>Variance</b> = none |
|                                                                                                                                                                                                                         |                                                                                                                               | $\hat{\sigma}_1$ :                               |
|                                                                                                                                                                                                                         |                                                                                                                               | <b>Mean</b> = none<br><br><b>Variance</b> = none |
| <b>Probabilities (<math>X_2</math>)</b>                                                                                                                                                                                 | A starting value of 0 implies neutrality between outcomes. Starting variance was chosen to be Bayes optimal using the tools   | $\hat{\mu}_2$ :                                  |
|                                                                                                                                                                                                                         |                                                                                                                               | <b>Mean</b> = 0                                  |

|                                             |                                                                                                                           |                                                                                          |
|---------------------------------------------|---------------------------------------------------------------------------------------------------------------------------|------------------------------------------------------------------------------------------|
|                                             | <p>provided in the TAPAS toolbox<br/>(‘tapas_bayes_optimal_binary_config’).</p>                                           | <p><b>Variance = 0</b></p>                                                               |
| <p><b>Volatility (<math>X_3</math>)</b></p> | <p>The absolute starting value of <math>X_3</math> is arbitrary, as changes in fitted parameters will affect scaling.</p> | <p><math>\hat{\sigma}_2</math>:</p> <p><b>Mean = 0.06</b></p> <p><b>Variance = 0</b></p> |
|                                             |                                                                                                                           | <p><math>\hat{\mu}_3</math>:</p> <p><b>Mean = 1</b></p> <p><b>Variance = 0</b></p>       |
|                                             |                                                                                                                           | <p><math>\hat{\sigma}_3</math>:</p> <p><b>Mean = 4</b></p> <p><b>Variance = 0</b></p>    |

86

87 **Supplementary Table 4: Details of each learning model used**

| <b>Model</b>                       | <b>Notes</b>                                                                                                               | <b>Estimated parameters: mean (standard deviation)</b>                           |
|------------------------------------|----------------------------------------------------------------------------------------------------------------------------|----------------------------------------------------------------------------------|
| Rescorla-Wagner                    | Beliefs are symmetrically updated, with a learning rate fitted to each subject.                                            | $\alpha = 0.38$ (0.21)                                                           |
| Asymmetric Rescorla-Wagner         | Beliefs are asymmetrically updated, with beliefs about the two stimuli updated individually.                               | $\alpha = 0.47$ (0.25)                                                           |
| Dual Learning Rate Rescorla-Wagner | Beliefs are updated with different learning rates on shock and no shock trials; two learning rates fitted to each subject. | $\alpha_{\text{Shock}} = 0.36$ (0.24)<br>$\alpha_{\text{NoShock}} = 0.35$ (0.24) |
| Sutton K1                          | Beliefs updated with a variable learning rate that depends upon the amplitude of recent prediction errors.                 | $\mu = 1.65$ (3.00)<br>$\nu = 0.53$ (0.31)<br>$h = 0.005$ (0.002)                |
| HGF                                | Three layer model with two fitted parameters governing connections between layers and step size at the top layer.          | $\theta = 0.034$ (0.02)<br>$\omega = -2.80$ (2.43)                               |

88

89 **Supplementary References**

- 90 1. Bach, D. R. & Friston, K. J. No evidence for a negative prediction error signal in  
91 peripheral indicators of sympathetic arousal. *Neuroimage* **59**, 883–884 (2012).  
92 2. de Gee, J. W., Knapen, T. & Donner, T. H. Decision-related pupil dilation reflects  
93 upcoming choice and individual bias. *Proceedings of the National Academy of Sciences*  
94 **111**, E618–25 (2014).
